# Supplementary material
Source: PubMed Central journal article supplement (PMC6905384)

**Results of univariate overall survival analyses in genes altered in  $\geq 10\%$  of patients who received combination PD-1/PD-L1 plus CTLA-4 therapy**

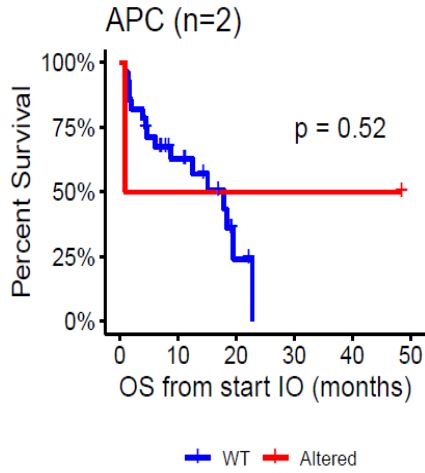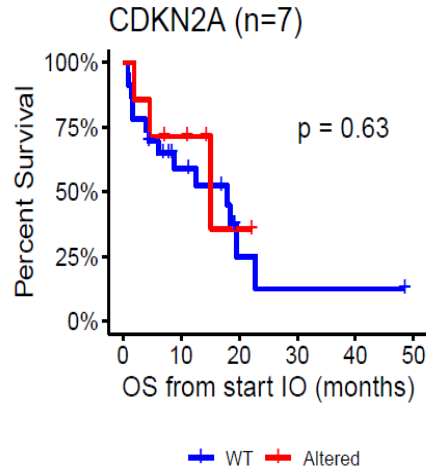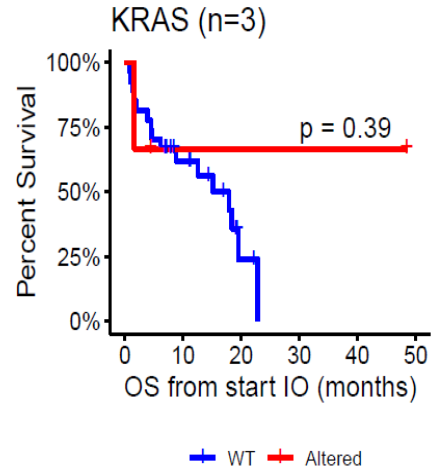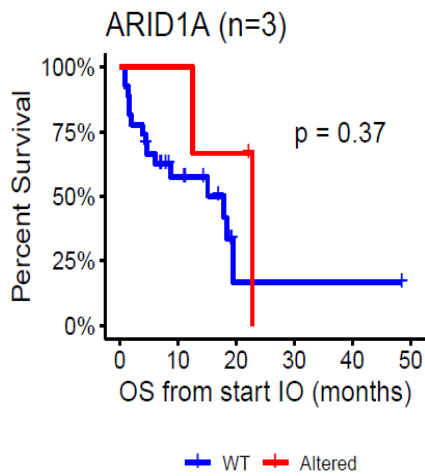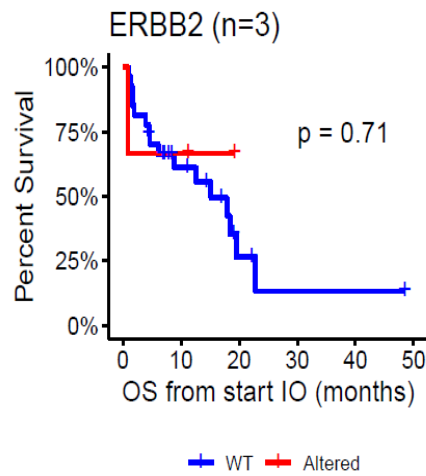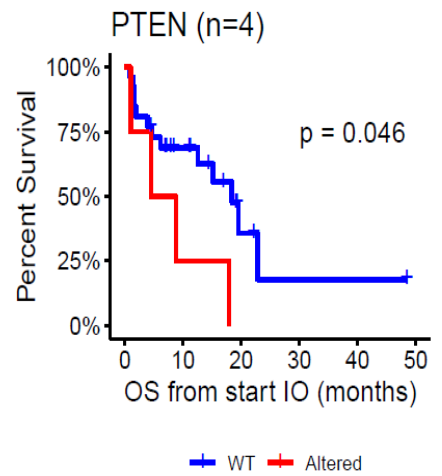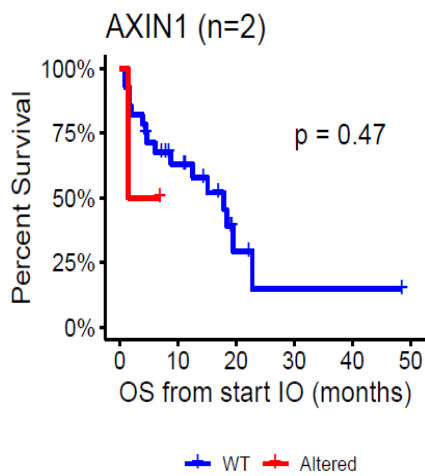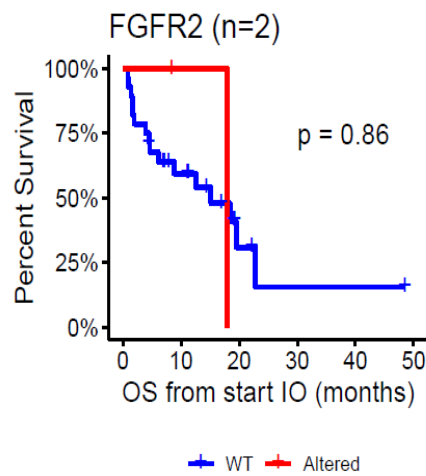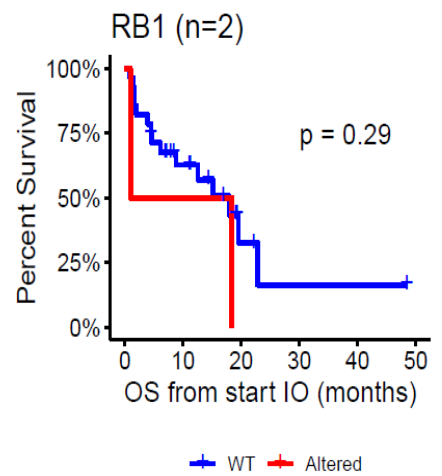

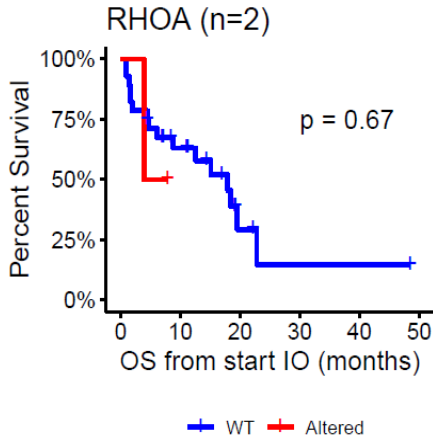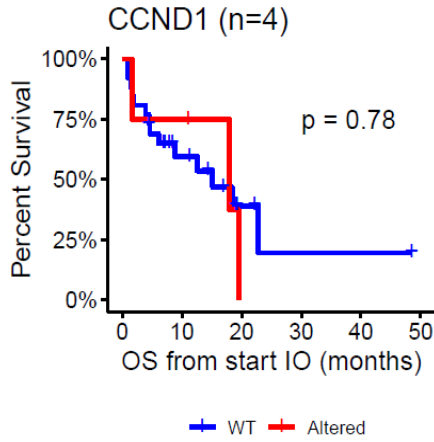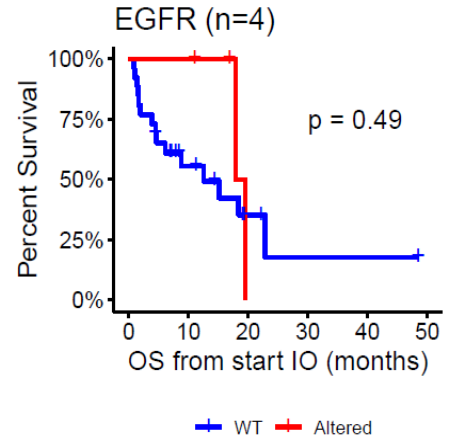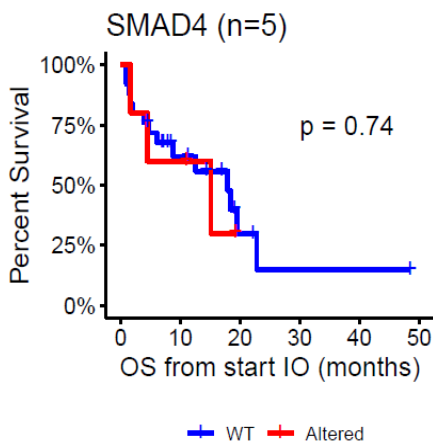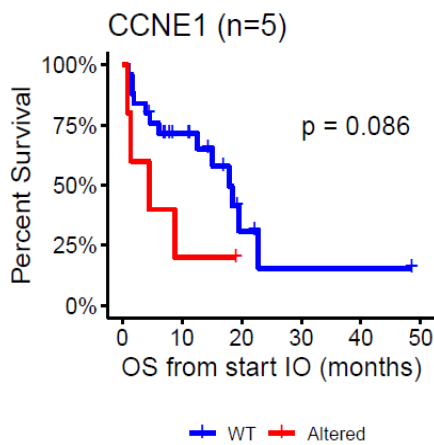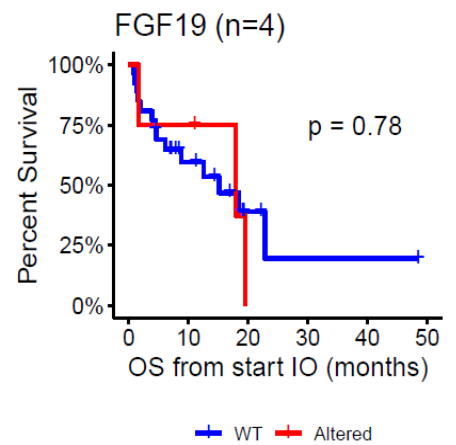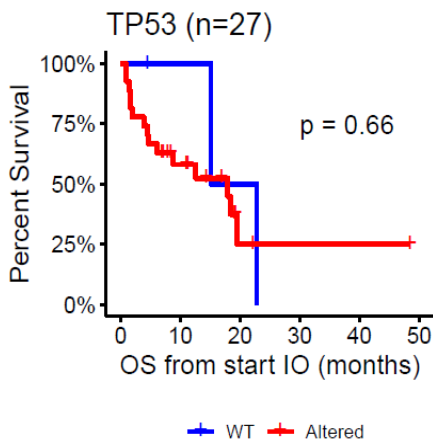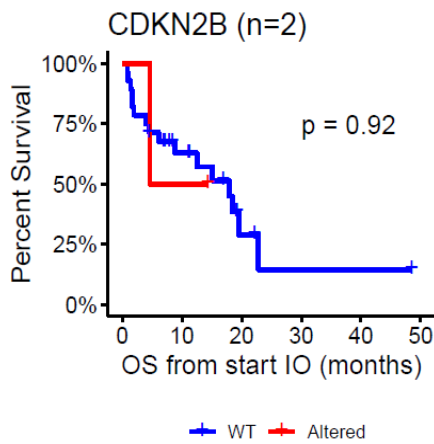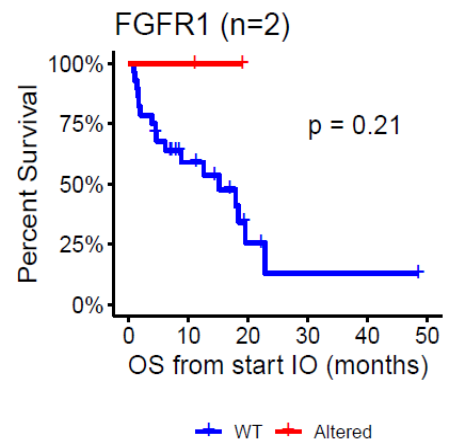

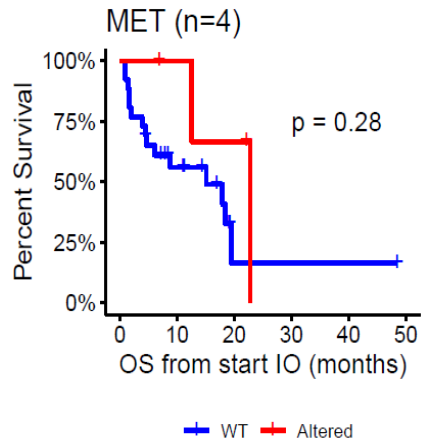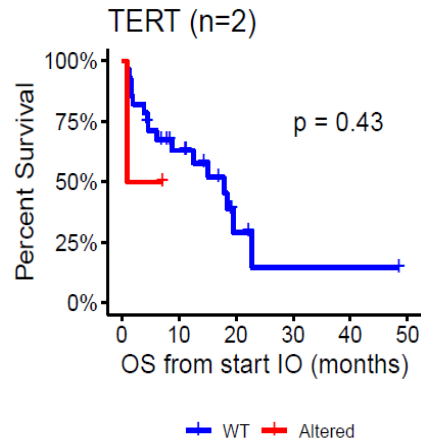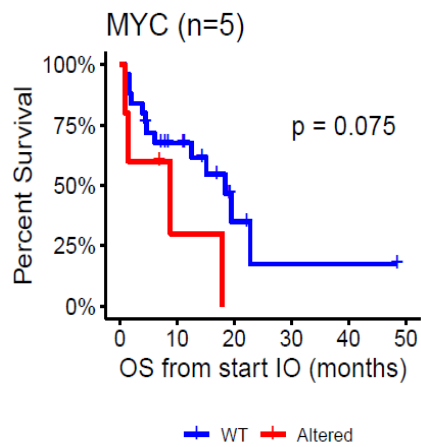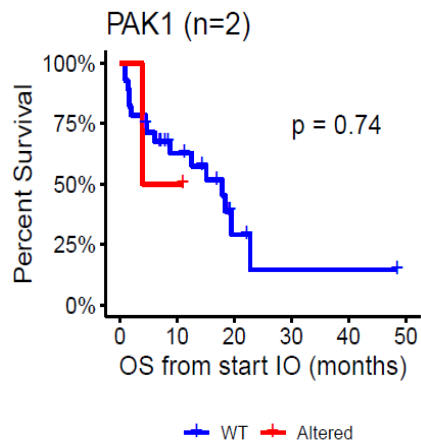

Supplement: NIHMS1535257-supplement-7.pdf [file NIHMS1535257-supplement-7.pdf]
