# Supplementary material
Source: PubMed Central journal article supplement (PMC6905384)

**Frequency and type of genomic alterations identified in the microsatellite stable (MSS) (left) and microsatellite unstable (MSI) (right) cohorts in patients who underwent targeted sequencing with MSK-IMPACT**

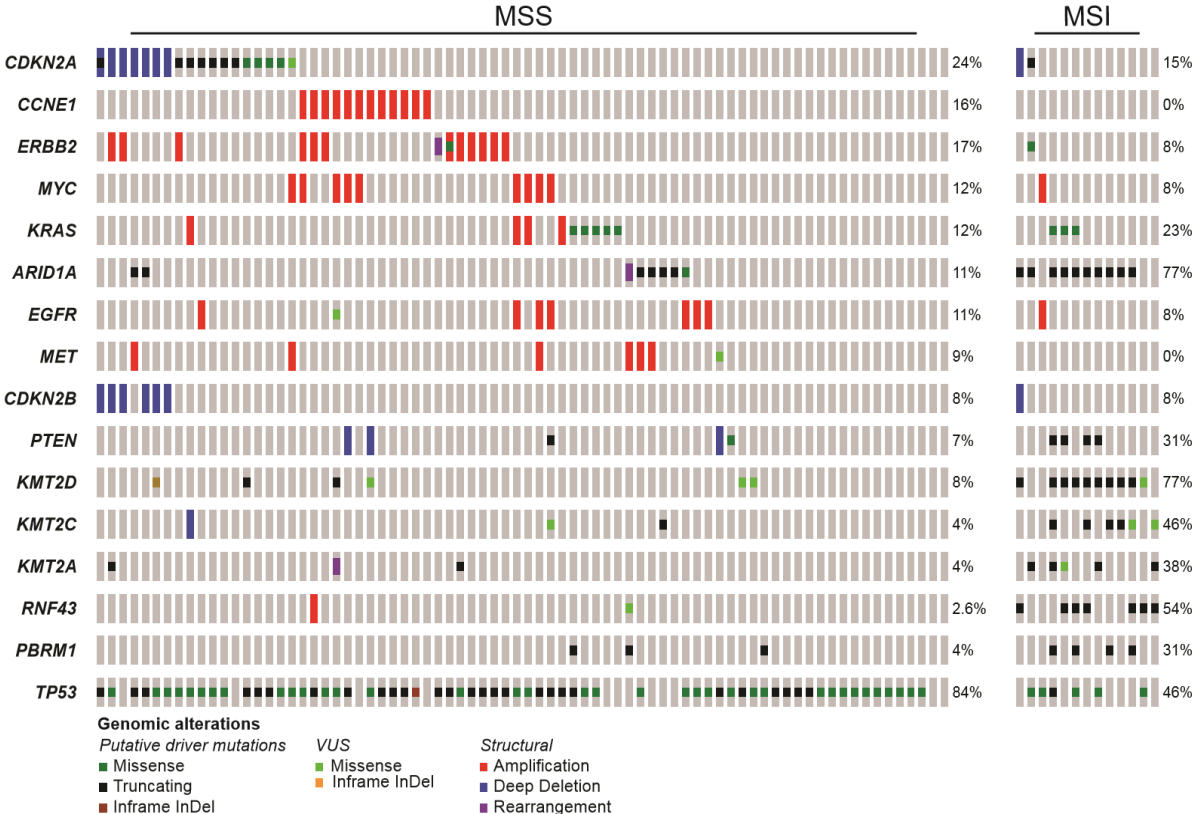

Supplement: NIHMS1535257-supplement-1.pdf [file NIHMS1535257-supplement-1.pdf]
