# Supplementary material
Source: PubMed Central journal article supplement (PMC6905384)

**Results of univariate overall survival analyses in genes altered in  $\geq 10\%$  of all patients who underwent tumor genomic profiling with MSK-IMPACT (excluding MSI and low purity cases)**

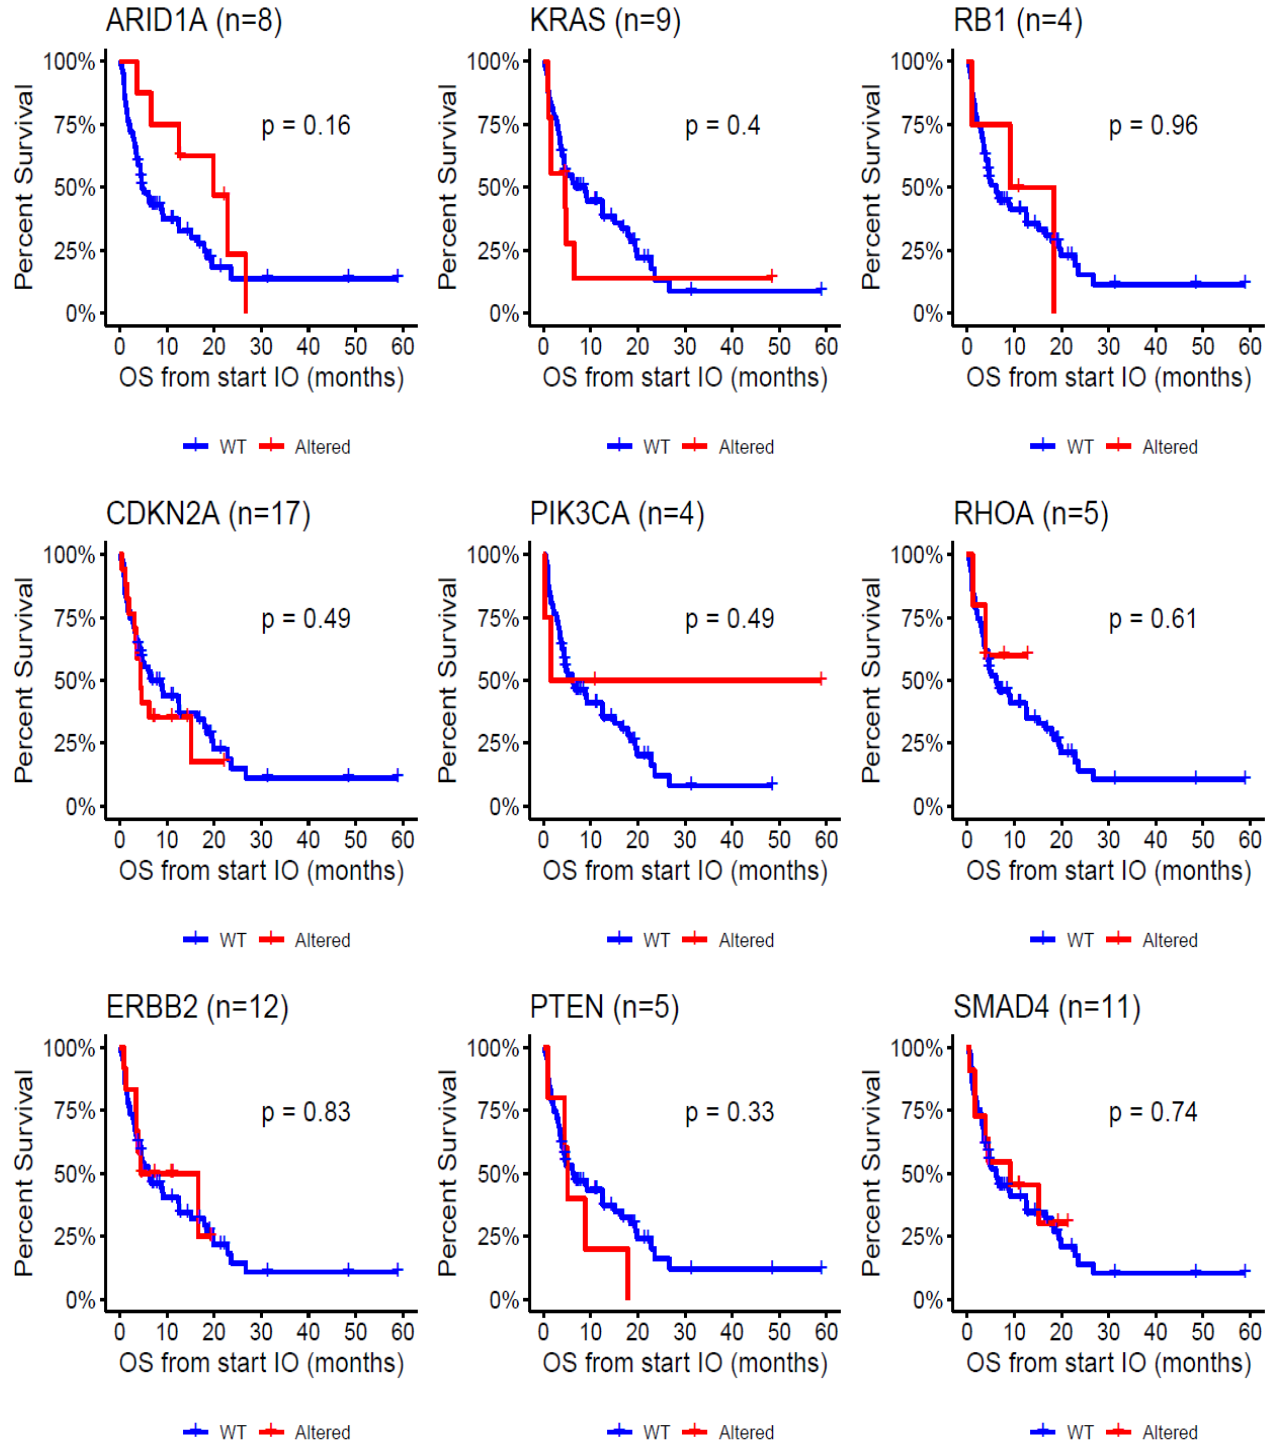

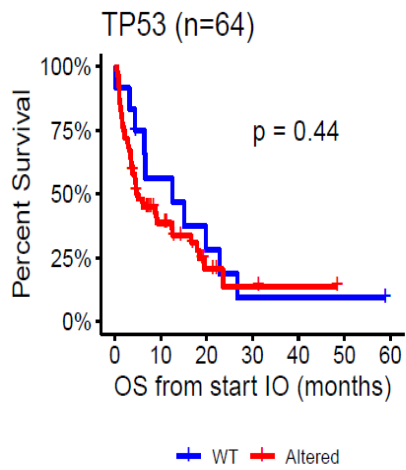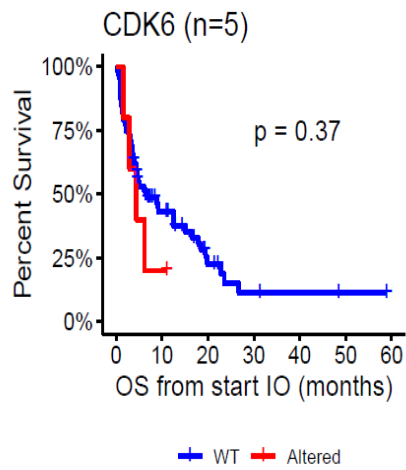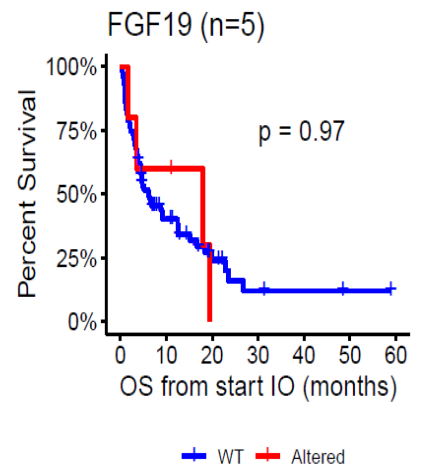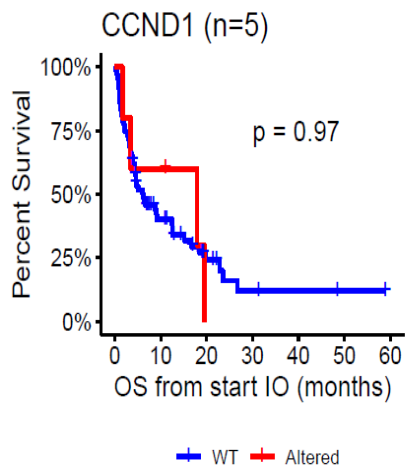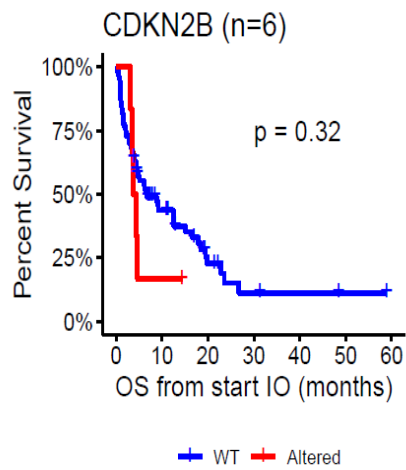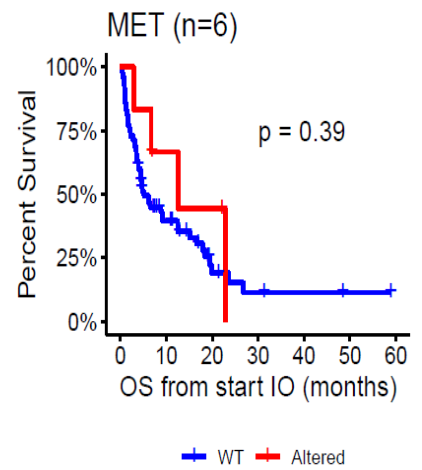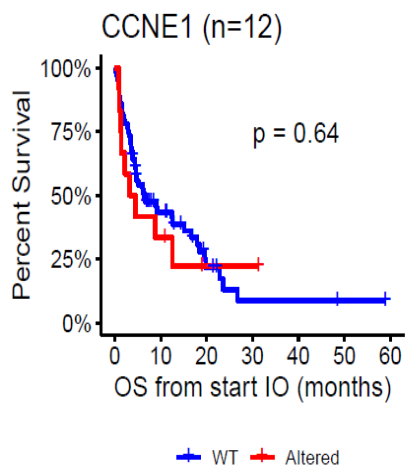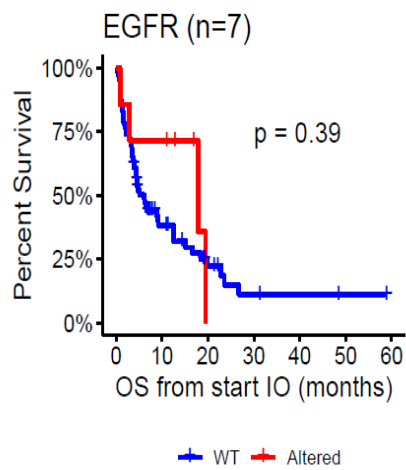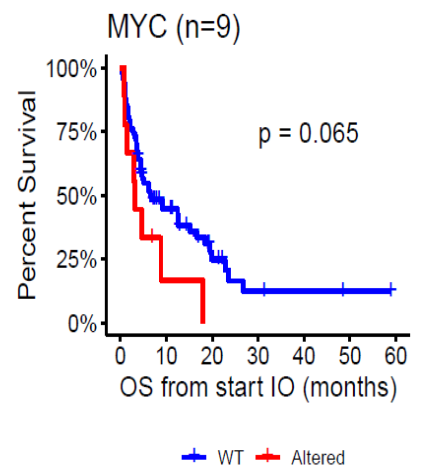

Supplement: NIHMS1535257-supplement-5.pdf [file NIHMS1535257-supplement-5.pdf]
